# Supplementary material
Source: PubMed Central journal article supplement (PMC4936552)
Supplement: supp_pp.16.00215_PP2016-00215R1_Supplemental_Material.pdf [file supp_pp.16.00215_PP2016-00215R1_Supplemental_Material.pdf]

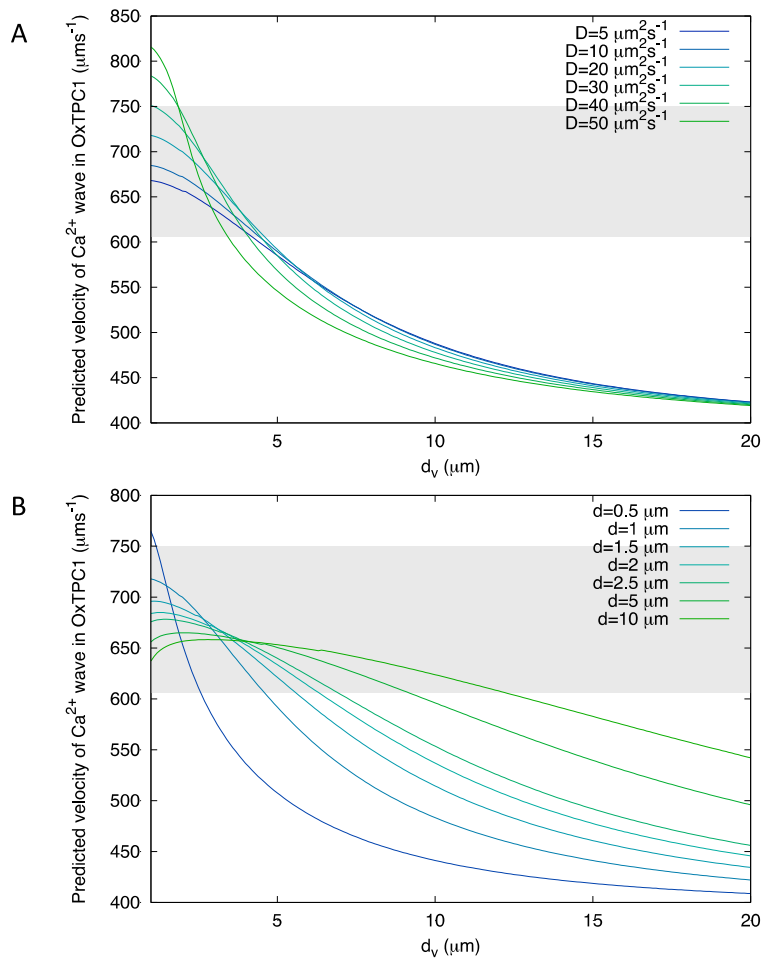

1  
2  
3  
4  
5  
6  
7  
8  
9  
10  
11

The results of the  
range of values

[Allbritton1992]. Increasing  $D$  further decreases the range of the intervacuolar distance  $d_v$  for which the model can reproduce the OxTPC1 velocity. This means that changing the buffering capacity of the cytoplasm ( $D$ ) does not affect the conclusions of the paper.  $L=100 \mu\text{m}$ ,  $d=1 \mu\text{m}$ . (B) The model is more sensitive to changes in TPC1 number, represented by changing distances between channels,  $d$ , in WT. Overexpressing TPC1 decrease  $d$  by a factor 0.6 (main text), native variability between different cell types should be much smaller than this.

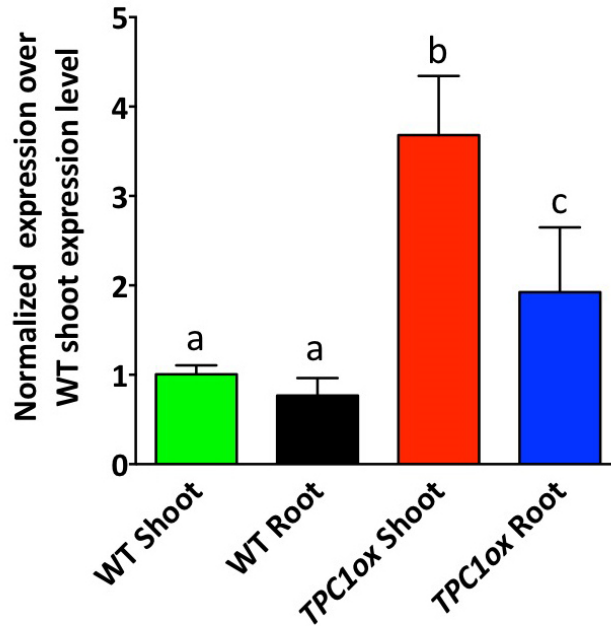

12

13

14 **Figure S2.** *TPC1* expression in root and shoot tissues of young seedlings. QPCR  
 15 analysis of *AtTPC1* expression level in root and shoot tissues of six day old seedlings of  
 16 WT Col\_0 and *TPC1ox* (*TPC1* overexpression line) was investigated using QPCR  
 17 analysis as described in the Methods. Error bars, SEM of  $n=9$  from 4 independent  
 18 biological replicates. Statistical analysis was performed using multiple comparison of  
 19 Student's *t*-test. Different letters denote significant differences  $p<0.05$ .

20

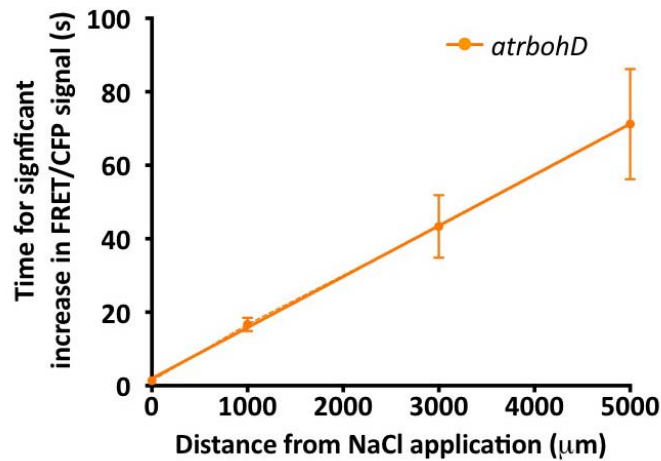

21

22

23 **Figure S3.**  $\text{Ca}^{2+}$  wave transmission rate in the *atrbohD* background. Time for the  
 24 YFP:CFP ratio to reach  $> 2$  s.d. above the pre-stimulation levels was calculated at 0,  
 25 1000, 3000 and 5000  $\mu\text{m}$  from the point of local 100 mM NaCl application to the root tip.  
 26 Regression analysis (solid line) indicated a rate of  $73.1 \pm 18.9 \mu\text{m s}^{-1}$ ,  $R^2=0.722$ ,  $n=5$  for  
 27 each distance. Identical analysis of wild-type in Choi et al., (2014) showed a  
 28 transmission rate of  $395.7 \pm 27.8 \mu\text{m/s}$ ,  $R^2=0.99$ ,  $n=23$ .

29

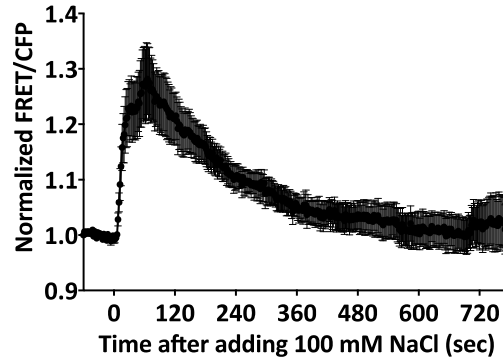

30

31 **Figure S4.** Calcium wave propagation in the OXTPC1 background pretreated with DPI.

32 OXTPC1 plants expressing YCNano-65 were pretreated with 50 $\mu$ M of the NADPH

33 oxidase inhibitor DPI for 30 min and then 100 mM NaCl added to the apical ~50  $\mu$ m of

34 the root tip. Calcium levels were monitored at 3000  $\mu$ m from the tip. Data represents

35 mean  $\pm$  s.d., n=7. Transmission rate was calculated from the time for the YFP:CFP

36 signal to increase  $\geq 2$  s.d. above the pretreatment levels averaged over 60 s prior to NaCl

37 addition.

38

39 **Supplementary Movie S1. Surface ROS production in response to medium**  
40 **addition to the root tip.** ROS levels were imaged using OxyBurst-BSA at 3000  $\mu\text{m}$   
41 shootward of the root tip. At 0 sec, growth medium was added to the apical most  $\sim 50$   $\mu\text{m}$   
42 of the root apex.

43

44 **Supplementary Movie S2. Surface ROS production in response to NaCl addition to**  
45 **the root tip.** ROS levels were imaged using OxyBurst-BSA at 3000  $\mu\text{m}$  shootward of the  
46 root tip. At 0 sec, growth medium containing 100 mM NaCl was added to the apical most  
47  $\sim 50$   $\mu\text{m}$  of the root apex.

48

49
